# Supplementary material for: Ordered coalescence of nano-crystals during rapid solidification of ceramic melts
Source: Royal Society of Chemistry journal article supplement (doi:10.1039/c1ce05436h), 2011-01-01
Supplement: c1ce05436h.pdf [file c1ce05436h.pdf]

## SUPPLEMENTARY INFORMATION

# Ordered Coalescence of Nano-Crystals during Rapid Solidification of Ceramic Melts

Daniel Grüner<sup>a</sup> and Zhijian Shen<sup>\*a</sup>

<sup>a</sup> Department of Materials and Environmental Chemistry, Arrhenius Laboratory, Stockholm University, 10691 Stockholm, Sweden. Fax: +46 8 152187; Tel: +46 8 162388; E-mail: shen@mmk.su.se

## EXPERIMENTAL METHODS

### 1. Materials

Dense aluminosilicate-zirconia beads of approximately 125  $\mu\text{m}$  diameter and overall chemical composition of 60-70%  $\text{ZrO}_2$ , 28-33%  $\text{SiO}_2$  and less than 10%  $\text{Al}_2\text{O}_3$  were used as precursors. The ceramic beads were prepared by a gas atomization process in which the ceramic melt was gas atomized through a nozzle forming melt droplets that were further rapidly solidified in a water bath.

### 2. Laser sintering

An Yb-fiber laser with 1060-1100 nm wave length and a focused beam diameter of approximately 100  $\mu\text{m}$  was applied. The laser has a maximum power of 200 W, but it turned out that it is sufficient to apply 50 W at an exposure speed of  $\leq 7000$  mm/s to melt the targeted aluminosilicate-zirconia beads. From the melting features we estimate that the peak temperature exceeds the melting point of zirconia (2715°C).

### 3. Microstructure characterization

Fracture surfaces and natural surfaces of the laser-sintered bodies were studied using a JSM-7000F (JEOL, Tokyo, Japan) field emission scanning electron microscope. For more detailed studies of the microstructure, thin foils for transmission electron microscopy (TEM) were prepared. Approximately 0.5 mm  $\times$  2.5 mm wide and 0.3 mm thick pieces were cut from the bulk material using a low-speed saw equipped with a diamond wafering blade (Buehler, Lake Bluff, IL, USA), ground to 0.1 mm thickness using diamond abrasives fixed on polymer sheets, and ion-milled to electron transparency using a JEOL IS-09100 ion slicer operated at 5 kV. TEM images were obtained using a JEOL JEM-3010 TEM operated

at 300 kV and recorded using a KeenView CCD camera (Olympus Soft Imaging Systems, Münster, Germany). A JEOL JEM-2100 TEM was used to record EDX spectra at 200 kV accelerating voltage.

## SUPPORTING DATA

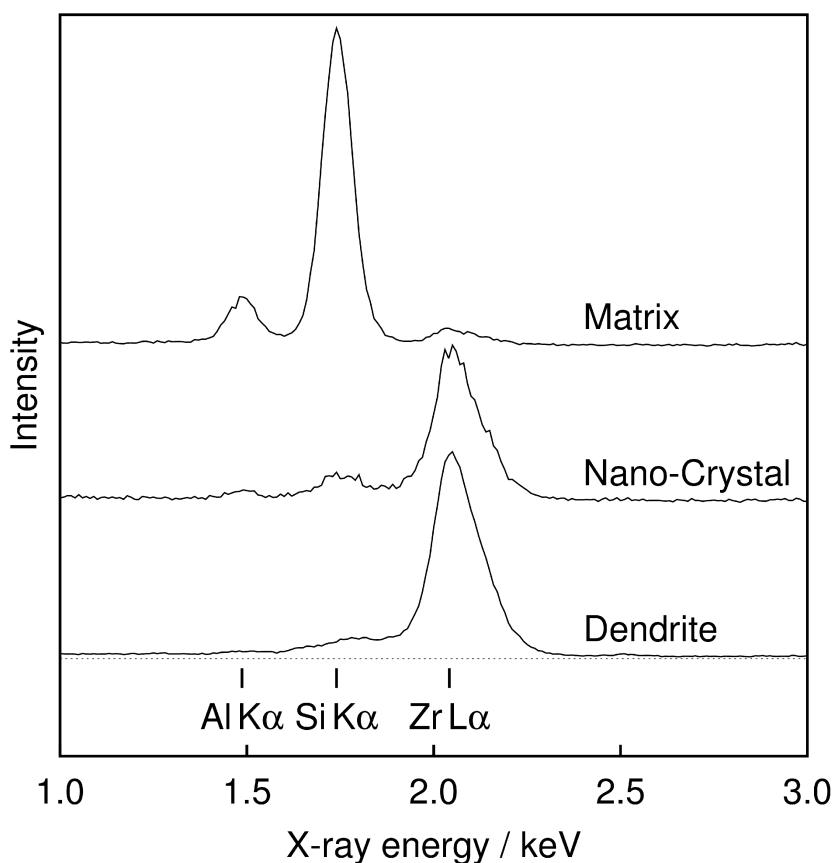

**Figure S1.** EDS spectra of regions of the TEM foil containing a dendritic crystal, an isolated nano-crystal and the glass matrix. While dendritic crystals and nano-crystals are composed of almost pure  $\text{ZrO}_2$ , the matrix is essentially free from zirconia and comprises mainly silica and a minor amount of alumina.

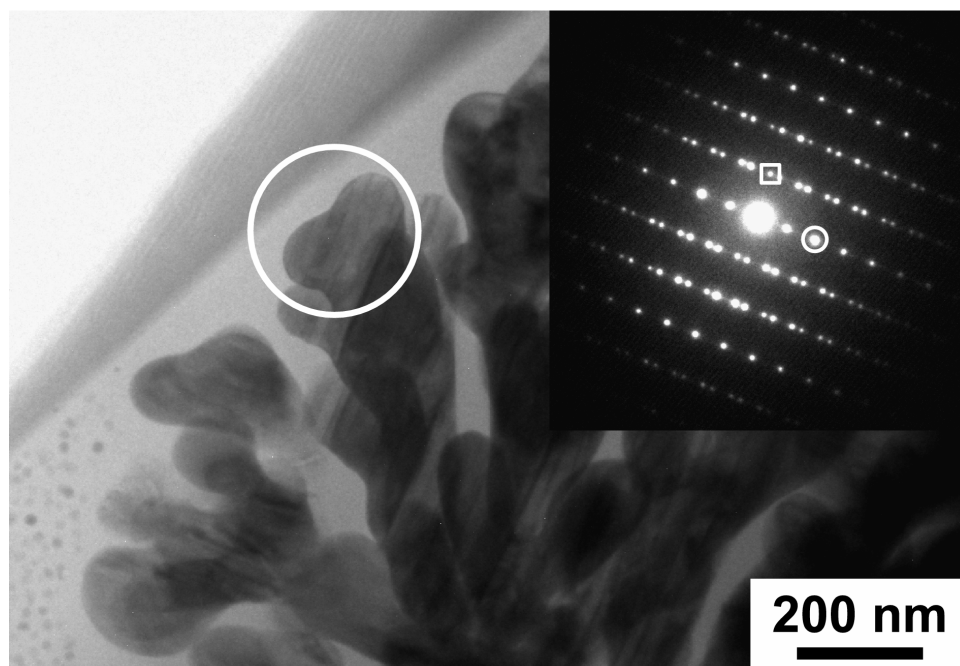

**Figure S2.** Dendritic zirconia crystals frequently show a banded contrast in bright field TEM images due to polysynthetic twinning on the (100) plane, which is confirmed by inspecting the selected area electron diffraction pattern (inset) taken along [011] from the region inside the circle. The reflections marked with a circle and a square are indexed 200 and 01-1 (twin component 1), respectively.

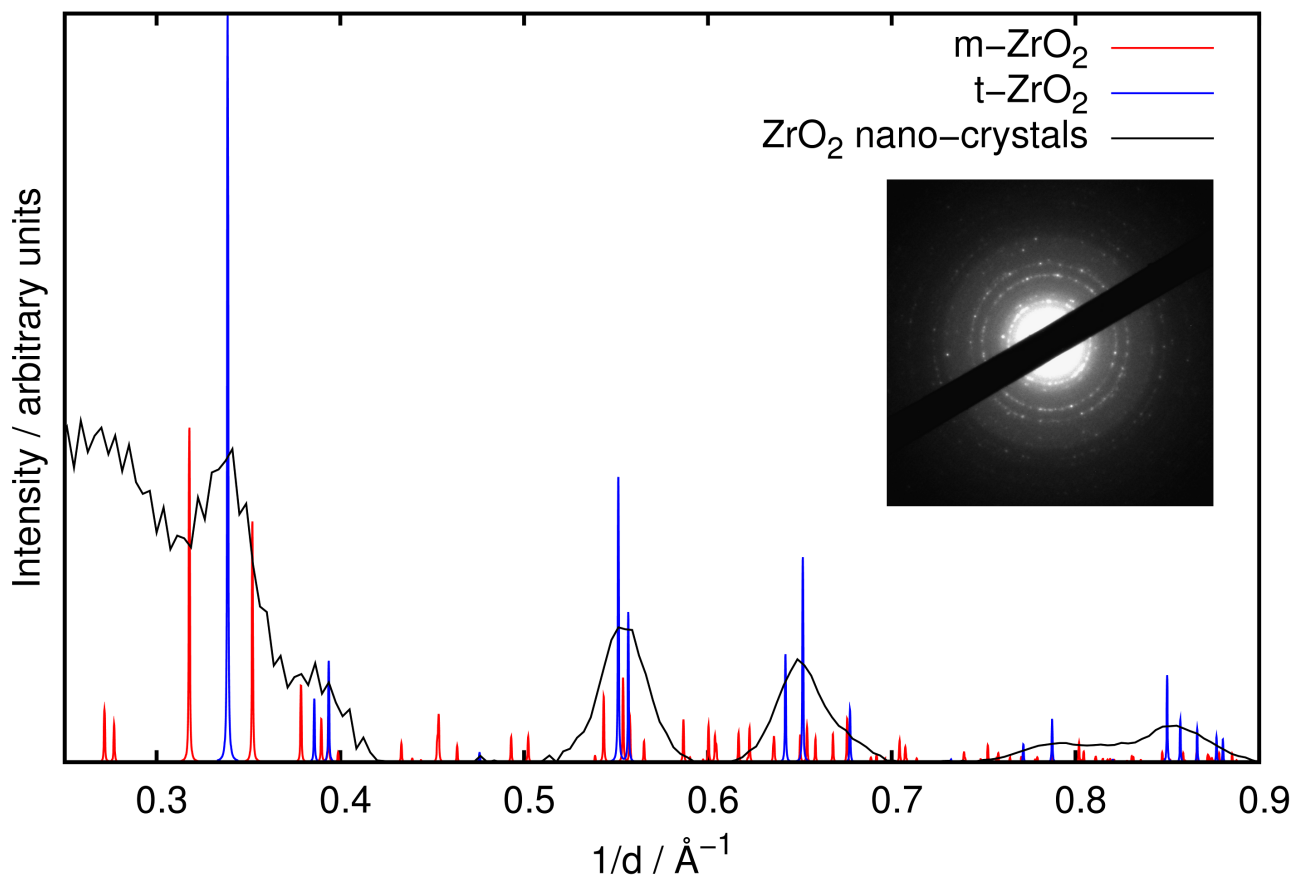

**Figure S3.** The inset shows a selected area electron diffraction pattern of a region of the laser sintered aluminosilicate-zirconia composite body containing zirconia nano-crystals embedded in an amorphous aluminosilicate matrix. The diffraction pattern shows rings of intensity from the randomly oriented nano-crystals. The intensity in the rings has been integrated using the program ELD (Zou, X. D.; Y. Sukharev, Y.; Hovmöller, S. *Ultramicroscopy* 1993, **49**, 147-158) and plotted as a function of  $1/d$ . The observed peak positions match the calculated ones for tetragonal zirconia (blue), but not for monoclinic zirconia (red).
